# Supplementary material for: Class 1 Heating Cycles: A New Class of Thermodynamic Cycles
Source: Preprints.org preprint supplement (doi:10.20944/preprints202110.0437.v1), 2021-10-28
Supplement: Supplementary file 1 [file supplementary]

# Class 1 heating cycles: A new class of thermodynamic cycles

Hong-Rui Li<sup>1,\*</sup> and Hua-Yu Li<sup>2,\*</sup>

<sup>1</sup>Key Laboratory of Efficient Utilization of Low and Medium Grade Energy (Ministry of Education), Tianjin University, Tianjin 300350, China.

<sup>2</sup>Department of Energy and Power engineering, China University of Petroleum (East China), Qingdao, Shandong 266580, China.

\*Corresponding authors: lhr@tju.edu.cn (H.-R.L.); lihy1963@upc.edu.cn (H.-Y.L.)

ORCID: 0000-0003-0249-7260 (H.-R.L.); 0000-0002-8229-019X (H.-Y.L.)

## Supplementary Information

Figure S1 shows three typical examples of class 1 heating cycles (HC-1s), which have been presented in the main text. Without loss of generality, they are all in basic form A (HC-1A). Here we derive their coefficients of performance (COPs, the ratio of the cycle's output to input) for medium-temperature heating or low-temperature cooling when the cycle's net work output  $W_{\text{net}} = 0$ . The former two cycles are regarded as internally reversible <sup>[1]</sup>.

### 1. The HC-1A with isothermal heat transfer processes (Figure S1a)

According to the law of conservation of energy, we have

$$W_{\text{net}} = Q_{\text{in, H}} + Q_{\text{in, L}} - Q_{\text{out}} = 0 \quad (\text{S1})$$

where  $Q_{\text{in, H}}$  is the amount of heat absorbed from the high-temperature heat source by the cycle,  $Q_{\text{in, L}}$  is the amount of heat absorbed from the low-temperature heat source

1 by the cycle, and  $Q_{\text{out}}$  is the amount of heat rejected to the medium-temperature heat  
 2 sink by the cycle.

3 The cycle's net entropy change should be zero. Thus,

$$4 \quad \oint dS = \frac{Q_{\text{in}, H}}{T_H} + \frac{Q_{\text{in}, L}}{T_L} - \frac{Q_{\text{out}}}{T_M} = 0 \quad (\text{S2})$$

5 Combining Eq. (S1) and Eq. (S2), we can express the COPs as

$$6 \quad \text{COP}_H = \frac{Q_{\text{out}}}{Q_{\text{in}, H}} = \frac{T_M(T_H - T_L)}{T_H(T_M - T_L)} \quad (\text{S3})$$

$$7 \quad \text{COP}_C = \frac{Q_{\text{in}, L}}{Q_{\text{in}, H}} = \frac{T_L(T_H - T_M)}{T_H(T_M - T_L)} \quad (\text{S4})$$

8 where  $\text{COP}_H$  and  $\text{COP}_C$  are the cycle's COPs for medium-temperature heating and  
 9 low-temperature cooling respectively.

10

## 11 **2. The HC-1A with isobaric heat transfer processes, employing an ideal gas as its** 12 **working medium (Figure S1b)**

13 Notice that state point 7 follows the rules of both heat rejection and  
 14 pressurization. Dividing the medium-temperature heat  $Q_{\text{out}}$  into two parts, and  
 15 regarding the ideal gas's isobaric specific heat  $c_p$  as constant <sup>[1]</sup>, we obtain

$$16 \quad W_{\text{net}} = Q_{\text{in}, H} + Q_{\text{in}, L} - Q_{\text{out}} = Q_{\text{in}, H} + Q_{\text{in}, L} - (Q_{\text{out}}^{(1)} + Q_{\text{out}}^{(2)}) = 0 \quad (\text{S5})$$

$$17 \quad \begin{aligned} Q_{\text{in}, H} &= H_3 - H_2 = mc_p(T_3 - T_2) \\ Q_{\text{in}, L} &= H_1 - H_6 = mc_p(T_1 - T_6) \\ Q_{\text{out}}^{(1)} &= H_4 - H_7 = mc_p(T_4 - T_7) \\ Q_{\text{out}}^{(2)} &= H_7 - H_5 = mc_p(T_7 - T_5) \end{aligned} \quad (\text{S6})$$

18 where  $H$  is the working medium's enthalpy at each state point,  $m$  is the working

medium's mass, and  $T$  is the working medium's thermodynamic temperature at each state point.

According to the behavior of the ideal gas <sup>[1]</sup> and Eq. (S6), we have

$$\left(\frac{p_H}{p_M}\right)^{\frac{k-1}{k}} = \frac{T_3}{T_4} = \frac{T_2}{T_7} = \frac{T_3 - T_2}{T_4 - T_7} = \frac{Q_{in, H}}{Q_{out}^{(1)}} \quad (S7)$$

$$\left(\frac{p_M}{p_L}\right)^{\frac{k-1}{k}} = \frac{T_7}{T_1} = \frac{T_5}{T_6} = \frac{T_7 - T_5}{T_1 - T_6} = \frac{Q_{out}^{(2)}}{Q_{in, L}} \quad (S8)$$

where  $k$  is the ideal gas's specific heat ratio.

Combining Eq. (S5), Eq. (S7) and Eq. (S8), we can express the COPs as

$$COP_H = \frac{Q_{out}}{Q_{in, H}} = \frac{Q_{out}^{(1)} + Q_{out}^{(2)}}{Q_{in, H}} = \frac{p_M^{\frac{k-1}{k}} \left( p_H^{\frac{k-1}{k}} - p_L^{\frac{k-1}{k}} \right)}{p_H^{\frac{k-1}{k}} \left( p_M^{\frac{k-1}{k}} - p_L^{\frac{k-1}{k}} \right)} \quad (S9)$$

$$COP_C = \frac{Q_{in, L}}{Q_{in, H}} = \frac{p_L^{\frac{k-1}{k}} \left( p_H^{\frac{k-1}{k}} - p_M^{\frac{k-1}{k}} \right)}{p_H^{\frac{k-1}{k}} \left( p_M^{\frac{k-1}{k}} - p_L^{\frac{k-1}{k}} \right)} \quad (S10)$$

or

$$COP_H = \frac{Q_{out}}{Q_{in, H}} = \frac{T_7(T_2 - T_1)}{T_2(T_7 - T_1)} = \frac{T_3T_5 - T_4T_6}{T_3(T_5 - T_6)} \quad (S11)$$

$$COP_C = \frac{Q_{in, L}}{Q_{in, H}} = \frac{T_1(T_2 - T_7)}{T_2(T_7 - T_1)} = \frac{T_6(T_3 - T_4)}{T_3(T_5 - T_6)} \quad (S12)$$

### 3. The HC-1A with isobaric heat transfer processes, employing a phase-change working medium (Figure S1c)

$$\text{COP}_H = \frac{Q_{\text{out}}}{Q_{\text{in}, H}} = \frac{H_4 - H_5}{H_3 - H_2} = \frac{h_4 - h_5}{h_3 - h_2} \quad (\text{S13})$$

$$\text{COP}_C = \frac{Q_{\text{in}, L}}{Q_{\text{in}, H}} = \frac{H_1 - H_6}{H_3 - H_2} = \frac{h_1 - h_6}{h_3 - h_2} \quad (\text{S14})$$

where  $h$  is the working medium's enthalpy per unit of mass at each state point. These two formulae cannot be further simplified because the behavior of the phase-change working medium is much more complex than that of the ideal gas.

When  $W_{\text{net}} \neq 0$ , we can also obtain the cycles' COPs in a similar way. However, since heat and power differ in grade, the meanings of such formulae are not clear.

## 1 Figures

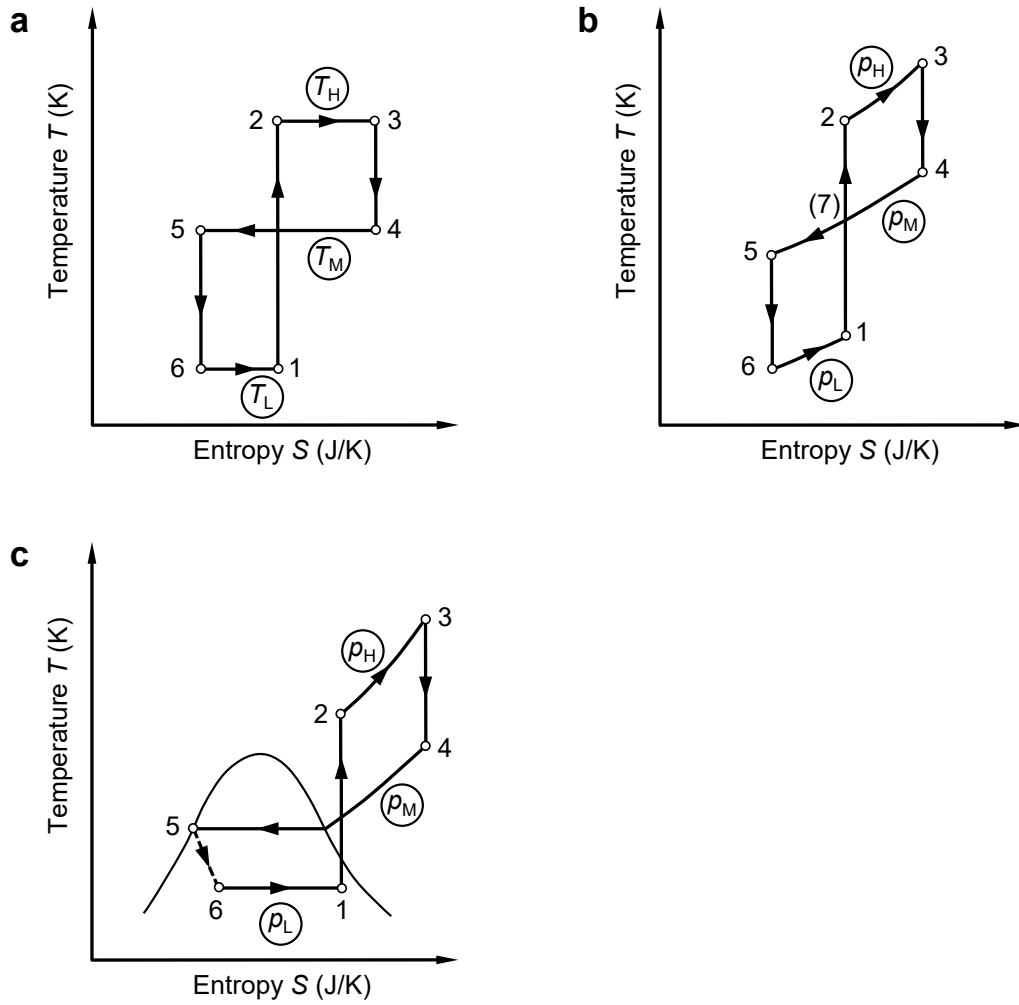

2

3 **Figure S1. Three typical examples of HC-1s. (a)** An HC-1A with isothermal heat

4 transfer processes.  $T_H$ ,  $T_M$  and  $T_L$  are the working medium's thermodynamic

5 temperatures during high-temperature heat absorption, medium-temperature heat

6 rejection, and low-temperature heat absorption, respectively. **(b)** An HC-1A with

7 isobaric heat transfer processes, employing an ideal gas as its working medium. State

8 point 7 is the state passed through by both process 1-2 and process 4-5. **(c)** An HC-1A

9 with isobaric heat transfer processes, employing a phase-change working medium.

10 The depressurization (throttling) process 5-6 is internally irreversible and thus

- 1    expressed as a dotted line. In (b) and (c),  $p_H$ ,  $p_M$  and  $p_L$  are the working medium's
- 2    pressures during high-temperature heat absorption, medium-temperature heat
- 3    rejection, and low-temperature heat absorption, respectively.

## 1    **References**

- 2    [1] Çengel YA, Boles MA, Kanoğlu M. Thermodynamics: An engineering approach.
- 3    9 ed. New York: McGraw-Hill Education, 2019.
